# Supplementary material for: Modulatory Effects of Acidic pH and Membrane Potential on the Adsorption of pH-Sensitive Peptides to Anionic Lipid Membrane
Source: MDPI journal article supplement (doi:10.3390/membranes11050307), 2021-04-22
Supplement: s1 [file s1]

Supplementary Materials

# Modulatory Effects of Acidic pH and Membrane Potential on the Adsorption of pH-Sensitive Peptides to Anionic Lipid Membrane

Dayane dos Santos Alvares <sup>1,†</sup>, Ingrid Bernardes Santana Martin <sup>1,†</sup>, Taisa Giordano Viegas<sup>1</sup>, Mario Sérgio Palma <sup>2</sup>, Alexandre Suman de Araújo<sup>1</sup>, Sidney Jurado de Carvalho<sup>1</sup>, and João Ruggiero Neto <sup>1,\*</sup>

<sup>1</sup> 2.UNESP - São Paulo State University, IBILCE, Department of Physics, São José do Rio Preto, SP, Brazil. [dayane.alvares@unesp.br](mailto:dayane.alvares@unesp.br) (D.d.S.A.); [ingrid.martins@unesp.br](mailto:ingrid.martins@unesp.br) (I.B.S.M.); [taisaviegas@gmail.com](mailto:taisaviegas@gmail.com) (T.G.V.); [alexandre.suman@unesp.br](mailto:alexandre.suman@unesp.br) (A.S.d.A.); [sidney.carvalho@unesp.br](mailto:sidney.carvalho@unesp.br) (S.J.d.C)

<sup>2</sup> UNESP - São Paulo State University, Institute of Biosciences, Department of Basic and Applied Biology, Rio Claro, SP, Brazil. [mario.palma@unesp.br](mailto:mario.palma@unesp.br)

\* Correspondence: [joao.ruggiero@unesp.br](mailto:joao.ruggiero@unesp.br)

<sup>†</sup>These authors contributed equally to this work.

## 1. Figure S1: Changes in 7POPC:3POPG LUVs' Average Diameter as a Function of a Half of Lipid Concentration Induced by the Peptides.

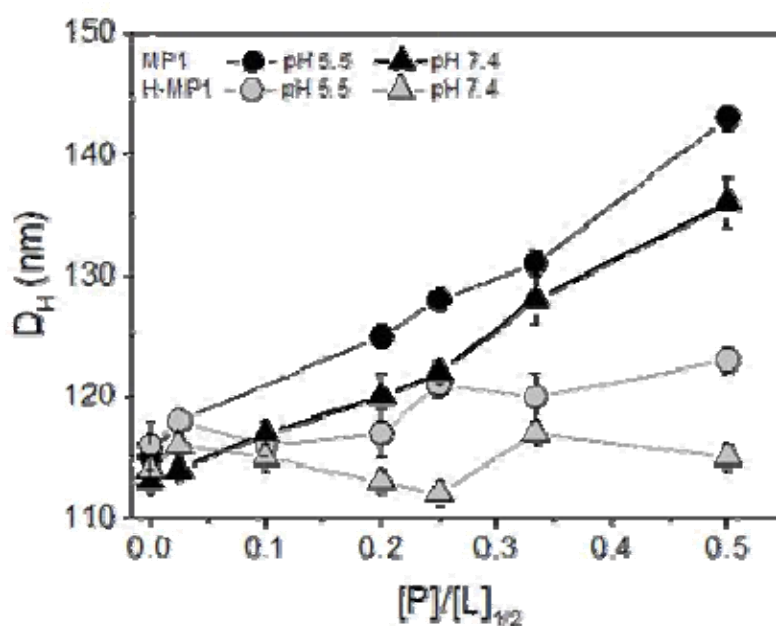

**Figure S1.** Changes in 7POPC:3POPG LUVs' average diameter as a function of a half of lipid concentration,  $[L]_{1/2}$ , for MP1 (dark symbols) and H-MP1 (gray symbols). Circles and triangles represent pH 5.5 and 7.4, respectively. All data correspond to the average ( $\pm$ SD) of three independent experiments.

## 2. Figure S2: Representative Fractional Fluorescence Intensity of TRP Residue of MP1.

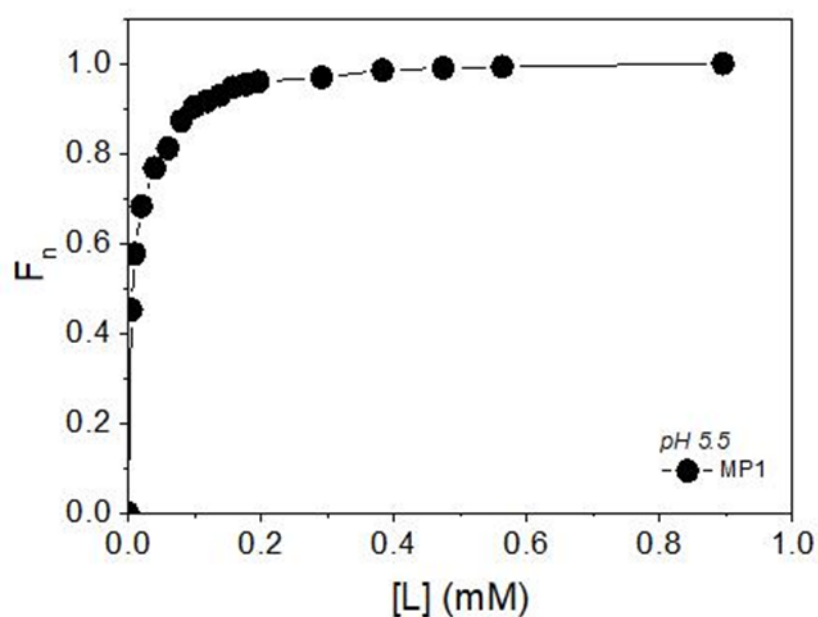

**Figure S2.** Representative fractional fluorescence intensity of TRP residue of a 2  $\mu$ M MP1 concentration at pH 5.5 in solution and in the presence of lipid as a function of a half of the lipid concentration,  $[L]_{1/2}$ .

### 3. Figure S3: Relative Changes in the Surface Potential of 7POPC:3POPG LUVs as a Function of the Peptide-to-Lipid Molar Ratio for Both Peptides.

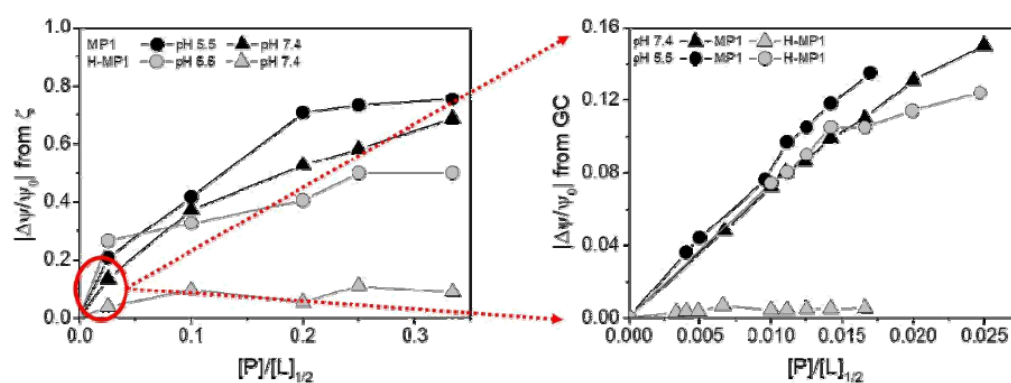

**Figure S3.** Relative changes in the surface potential ( $\Delta\psi/\psi_0$ ) of 7POPC:3POPG LUVs as a function of the peptide-to-lipid molar ratio for MP1 (dark symbols) and H-MP1 (gray symbols). Circles and triangles represent pH 5.5 and 7.4, respectively.  $\Delta\psi/\psi_0$  values were calculated from zeta potential measurements (left) and from Gouy-Chapman theory (right).

### Figure S4: The Radial Distribution Function $g(r)$ of the Residues Pairs Lys-Asp and His-Asp.

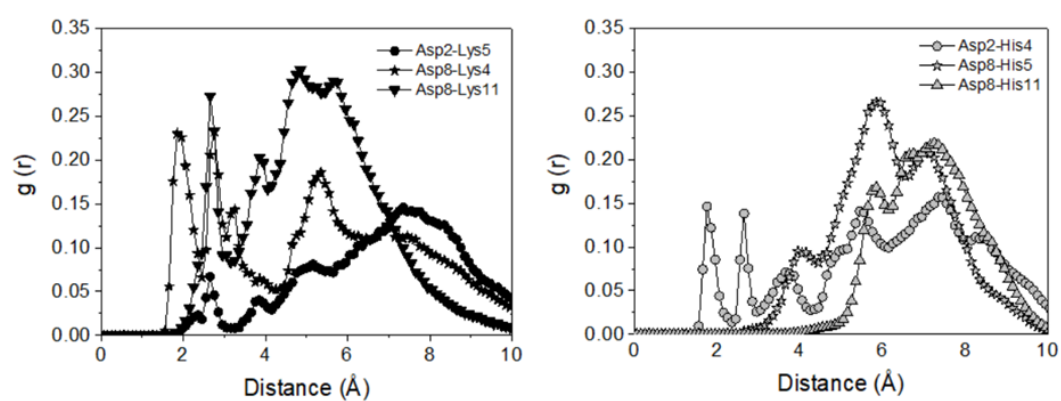

**Figure S4.** The radial distribution function  $g(r)$  of the residues pairs (**left**) Asp-Lys in MP1 and (**right**) Asp-His in H-MP1 adsorbed on the bilayer at pH~5.5.
